# Supplementary material for: Metabolomics reveal mitochondrial and fatty acid metabolism disorders that contribute to the development of DKD in T2DM patients
Source: Royal Society of Chemistry journal article supplement (doi:10.1039/c7mb00167c), 2017-09-14
Supplement: c7mb00167c1.pdf [file c7mb00167c1.pdf]

## Supplementary Material

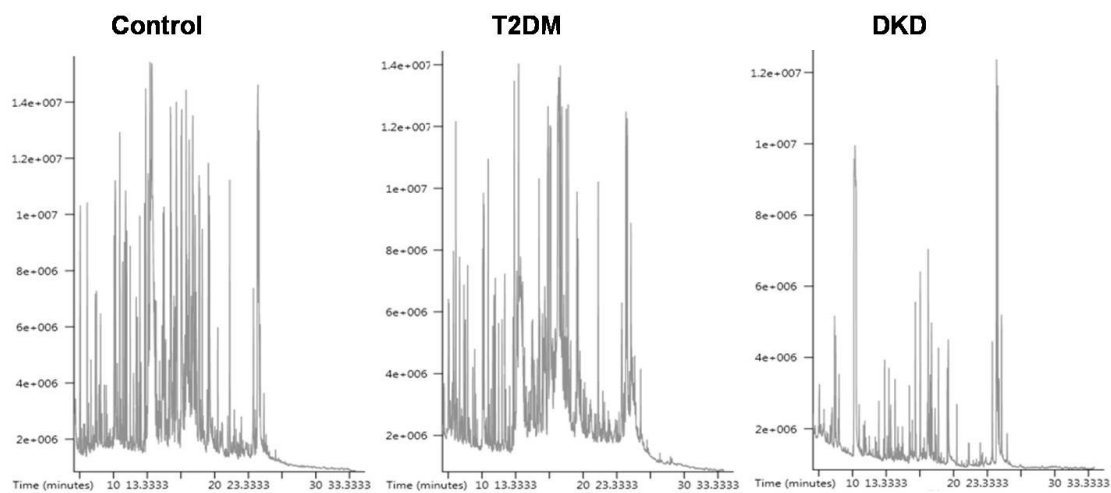

**Fig. S1** Representative GC-MS total ion chromatograms (TIC) of urine samples obtained from normal control, T2DM and DKD patients.

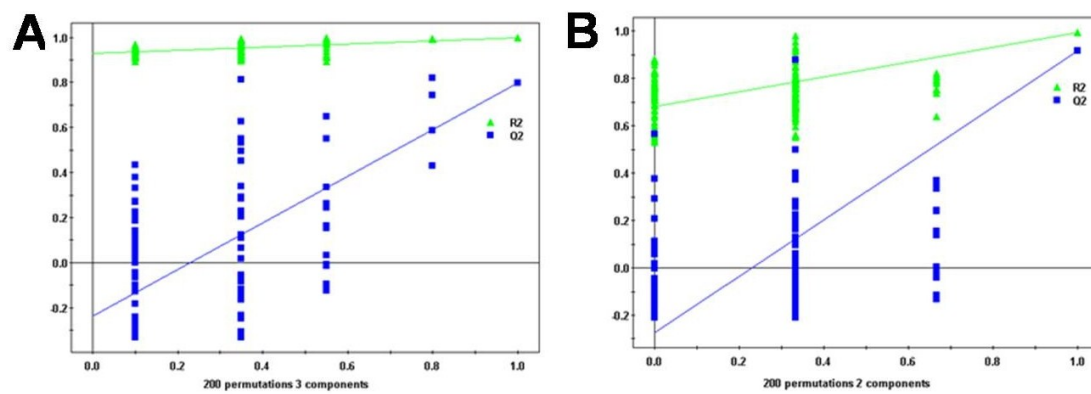

**Fig. S2** Validation plots of the OPLS-DA model for the (A) T2DM and (B) DKD groups by using a permutation test with randomly permuted 200 times.
